# Supplementary material
Source: publisher figshare collection journal article supplement (https://tandf.figshare.com/ndownloader/files/15350756)
Supplement: Supplementary file 1 [file 15350756]

## Supplementary Materials

**Table S1 – Univariate frequencies in June 2012**

| <b>Variable</b>             | <b>Freq.</b> | <b>Percent</b> | <b>Cum.</b> |
|-----------------------------|--------------|----------------|-------------|
| <b>Gender</b>               |              |                |             |
| female                      | 146          | 41.2           | 41.2        |
| male                        | 208          | 58.8           | 100.0       |
| <b>Marital status</b>       |              |                |             |
| married                     | 141          | 39.8           | 39.8        |
| married polygamously        | 21           | 5.9            | 45.8        |
| divorced/separated          | 49           | 13.8           | 59.6        |
| widowed                     | 30           | 8.5            | 68.1        |
| never married               | 89           | 25.1           | 93.2        |
| cohabitating                | 24           | 6.8            | 100.0       |
| <b>Job status</b>           |              |                |             |
| wage employed               | 100          | 28.3           | 28.3        |
| self-employed               | 163          | 46.1           | 74.3        |
| unemployed                  | 91           | 25.7           | 100.0       |
| <b>Religion</b>             |              |                |             |
| catholic                    | 114          | 32.2           | 32.2        |
| protestant                  | 100          | 28.3           | 60.5        |
| muslim                      | 75           | 21.2           | 81.6        |
| other                       | 65           | 18.4           | 100.0       |
| <b>Source of disability</b> |              |                |             |
| RTA/injury                  | 45           | 13.1           | 13.1        |
| congenital deformity        | 5            | 1.5            | 14.6        |
| injection/infection         | 19           | 5.5            | 20.1        |
| osteoarthritis/stroke/other | 52           | 15.2           | 35.3        |
| polio                       | 222          | 64.7           | 100.0       |

**Table S2 – Randomization**

| <b>Variable</b>                       | <b>mean (T)</b> | <b>mean (C)</b> | <b>Ttest (p-value)</b> |
|---------------------------------------|-----------------|-----------------|------------------------|
| <b>Socio-economic characteristics</b> |                 |                 |                        |
| Age                                   | 40              | 41              | 0.960                  |
| Years of schooling                    | 8.9             | 8.8             | 0.759                  |
| HH income                             | 173816          | 163958          | 0.395                  |
| Job status                            | 2.0             | 2.0             | 0.652                  |
| Marital status                        | 2.9             | 3.1             | 0.280                  |
| HH size                               | 5.1             | 5.3             | 0.352                  |
| No. children                          | 2.2             | 2.1             | 0.760                  |
| <b>Medical data</b>                   |                 |                 |                        |
| Timed Up and Go                       | 13.1            | 13.0            | 0.892                  |
| Mobility                              | 56.53           | 55.17           | 0.694                  |
| Physical functioning                  | 64.95           | 68.35           | 0.182                  |
| Role limitations                      | 66.61           | 70.49           | 0.134                  |
| Length of disability                  | 28.7            | 31.6            | 0.126                  |
| <b>Subjective well-being</b>          |                 |                 |                        |
| Life satisfaction                     | 3.4             | 3.4             | 0.811                  |
| <b>Aspirations</b>                    |                 |                 |                        |
| Sufficient income                     | 4.6             | 4.7             | 0.245                  |
| Minimum income                        | 4.2             | 4.3             | 0.263                  |

**Table S3 – Mean values at the baseline between patients who remained in the project in all the four waves and those who are not available for at least one of the three follow-up.**

|                                       | Not available in at least one follow-up | Available in all follow-ups | Ttest (p-value) |
|---------------------------------------|-----------------------------------------|-----------------------------|-----------------|
| <b>Socio-economic characteristics</b> |                                         |                             |                 |
| Age                                   | 39                                      | 42                          | 0.078           |
| Years of schooling                    | 8.8                                     | 8.9                         | 0.758           |
| HH income                             | 174748                                  | 167222                      | 0.492           |
| Job status                            | 2.0                                     | 2.0                         | 0.562           |
| Marital status                        | 2.9                                     | 3.0                         | 0.650           |
| HH size                               | 5.1                                     | 5.1                         | 0.990           |
| No. children                          | 2.3                                     | 2.0                         | 0.114           |
| <b>Medical data</b>                   |                                         |                             |                 |
| Timed Up and Go                       | 12.5                                    | 13.6                        | 0.224           |
| Mobility                              | 57.8                                    | 54.6                        | 0.318           |
| Physical functioning                  | 64.2                                    | 67.7                        | 0.140           |
| Role limitations                      | 66.8                                    | 68.8                        | 0.403           |
| Length of disability                  | 28.9                                    | 30.2                        | 0.453           |
| <b>Subjective well-being</b>          |                                         |                             |                 |
| Life satisfaction                     | 3.5                                     | 3.3                         | 0.329           |
| <b>Aspirations and expectations</b>   |                                         |                             |                 |
| Sufficient income                     | 4.6                                     | 4.6                         | 0.708           |
| Minimum income                        | 4.2                                     | 4.2                         | 0.935           |

**Table S4 – Randomization after attrition (N=197)**

|                                       | mean (T) | mean (C) | Ttest (p-value) |
|---------------------------------------|----------|----------|-----------------|
| <b>Socio-economic characteristics</b> |          |          |                 |
| Age                                   | 41       | 42       | 0.630           |
| Years of schooling                    | 9.0      | 8.4      | 0.324           |
| HH income                             | 170850   | 159121   | 0.449           |
| Job status                            | 2.0      | 2.0      | 0.957           |
| Marital status                        | 2.9      | 3.1      | 0.526           |
| HH size                               | 5.1      | 5.3      | 0.654           |
| No. children                          | 2.3      | 2.3      | 0.891           |
| <b>Medical data</b>                   |          |          |                 |
| Timed Up and Go                       | 13.5     | 13.8     | 0.847           |
| Mobility                              | 55.53    | 52.40    | 0.528           |
| Physical functioning                  | 66.00    | 71.54    | 0.126           |
| Role limitations                      | 67.27    | 72.31    | 0.171           |
| Length of disability                  | 28.8     | 33.5     | 0.075           |
| <b>Subjective well-being</b>          |          |          |                 |
| Life satisfaction                     | 3.3      | 3.4      | 0.753           |
| <b>Aspirations</b>                    |          |          |                 |
| Sufficient income                     | 4.6      | 4.7      | 0.328           |
| Minimum income                        | 4.2      | 4.3      | 0.552           |

**Table S5 – Sample size medical measures**

| <b>Jun-12</b>        |     |          |          |      |     |
|----------------------|-----|----------|----------|------|-----|
|                      | Obs | Mean     | Std.     | Min  | Max |
| Mobility             | 174 | 54.5977  | 29.84878 | 0    | 100 |
| Physical functioning | 172 | 67.67442 | 21.77366 | 20   | 100 |
| Role limitations     | 173 | 68.78613 | 22.13136 | 20   | 100 |
| <b>Nov-12</b>        |     |          |          |      |     |
|                      | Obs | Mean     | Std.     | Dev. | Min |
| Mobility             | NA  |          |          |      |     |
| Physical functioning | 197 | 68.93401 | 19.72724 | 40   | 100 |
| Role limitations     | 197 | 70.25381 | 19.65095 | 20   | 100 |
| <b>Apr-13</b>        |     |          |          |      |     |
|                      | Obs | Mean     | Std.     | Dev. | Min |
| Mobility             | NA  |          |          |      |     |
| Physical functioning | 197 | 68.4264  | 19.37969 | 20   | 100 |
| Role limitations     | 197 | 72.38579 | 19.08342 | 20   |     |
| <b>Jun-13</b>        |     |          |          |      |     |
|                      | Obs | Mean     | Std.     | Dev. | Min |
| Mobility             | 190 | 52.96053 | 25.10464 | 0    | 100 |
| Physical functioning | 193 | 60.82902 | 20.59877 | 20   | 100 |
| Role limitations     | 193 | 66.83938 | 20.58671 | 20   | 100 |
